# Supplementary material for: p53-intact cancers escape tumor suppression through loss of long noncoding RNA Dino
Source: PubMed Central journal article supplement — Cell Rep. Author manuscript; Available in PMC 2021 Jul 19. (PMC8287872; doi:10.1016/j.celrep.2021.109329), 2021-06-29
Supplement: NIHMS1720100-supplement-1.pdf [file NIHMS1720100-supplement-1.pdf]

Cell Reports, Volume 35

## Supplemental information

### **p53-intact cancers escape tumor suppression through loss of long noncoding RNA *Dino***

**Christina B. Marney, Erik S. Anderson, Mutayyaba Adnan, Kai-Lin Peng, Ya Hu, Nils Weinhold, and Adam M. Schmitt**

## Supplemental Information

### **This PDF file includes:**

Supplemental References

Figures S1- S5

Tables S1 to S4

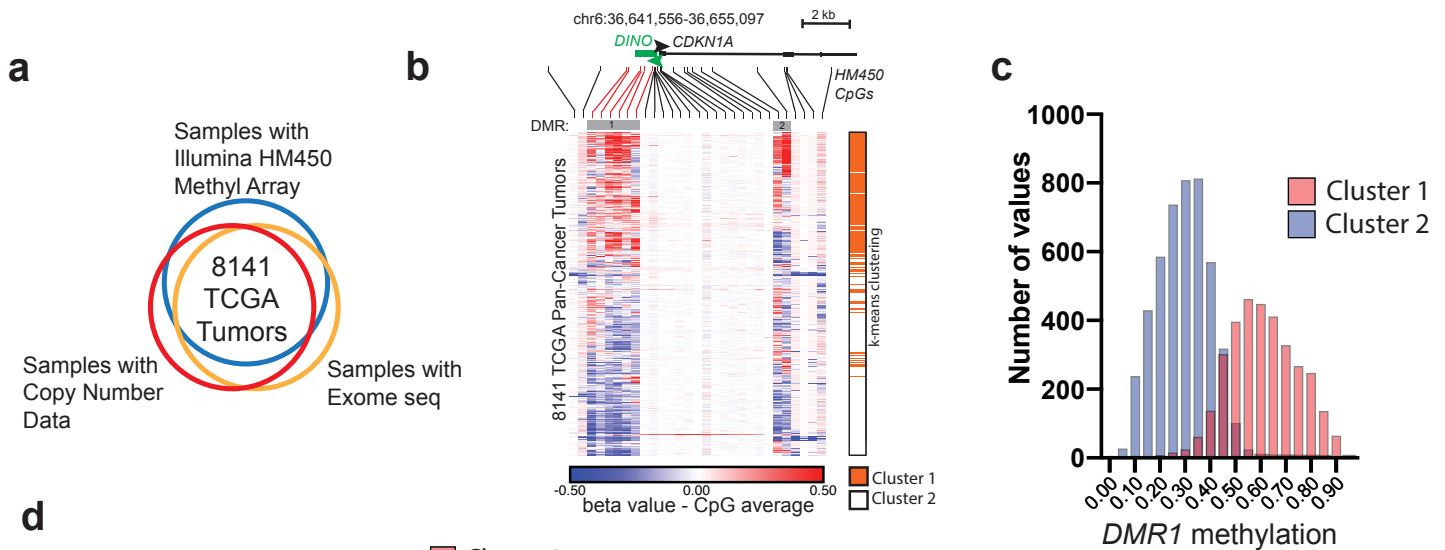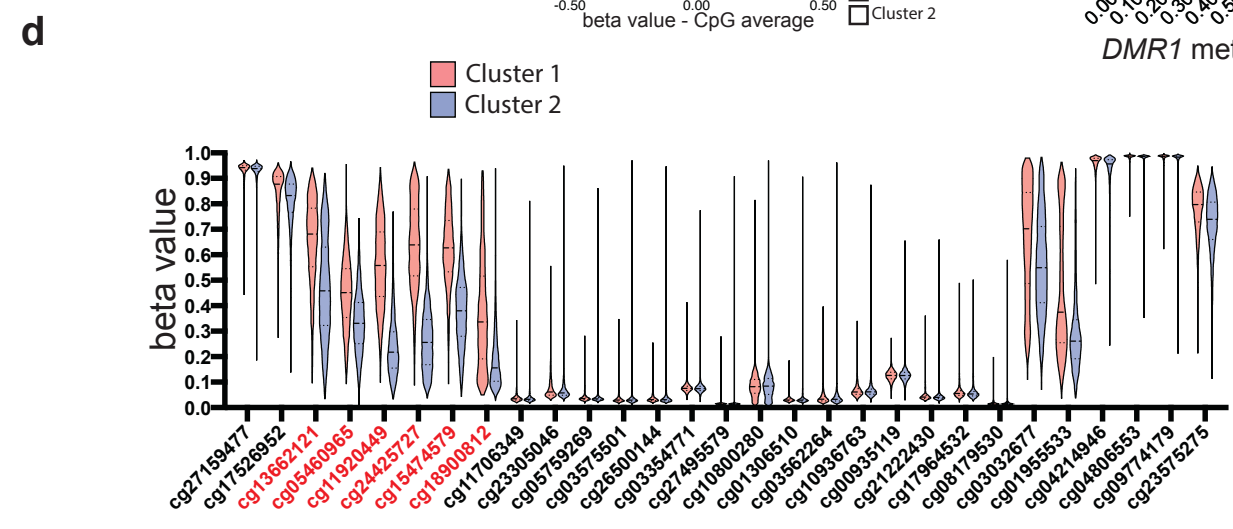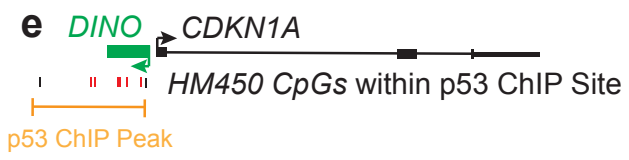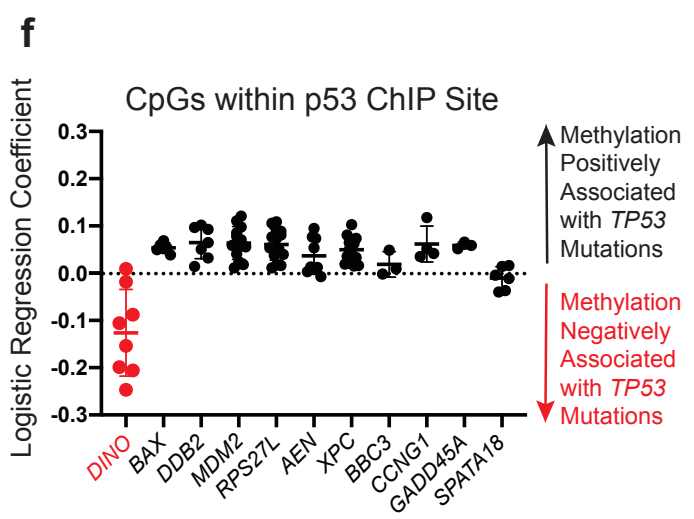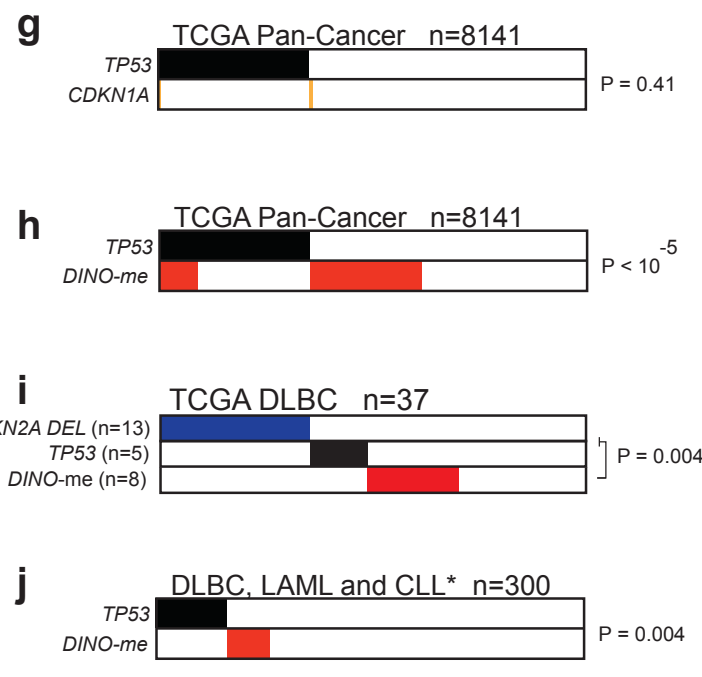

**Figure S1. Identification of differentially methylated regions at the *DINO/CDKN1A* locus.**

**Related to Figure 1.** **a**, Selection criteria for TCGA Pan-Cancer samples in this study. **b**, Relative methylation at HM450 CpGs covering the *DINO/CDKN1A* locus in TCGA Pan-Cancer samples. Above: red lines indicate the position of differentially methylated CpGs downstream of the *DINO* TSS. In this scale, 0 represents average beta value at each CpG across all Pan-Cancer samples. **c**, Histogram of average *DINO* methylation in methylated (Cluster 1) and unmethylated (Cluster 2) clusters in the Pan-Cancer dataset. Average methylation of 0.5 provides the optimal cutoff to distinguish the two clusters. **d**, Violin plots for methylation values at each HM450 CpG at the *DINO/CDKN1A* locus methylated and unmethylated clusters of TCGA Pan-Cancer samples, mean +/- standard deviation. **e**, Location of 8 Illumina HM450 CpGs within the human p53 ChIP peak at the *DINO/CDKN1A* locus previously described (Younger et al., 2015). **f**, Coefficient for logistic regression analyses for the association between methylation values at individual HM450 CpGs within define p53 ChIP peaks at p53-regulated genes that are most strongly associated with *TP53* status in the Pan-Cancer dataset, mean +/- standard deviation (Knijnenburg et al., 2018). **g**, Alteration matrix for *TP53* and *CDKN1A* in the TCGA Pan-Cancer samples. **h**, Alteration matrix for *TP53* and methylated *DINO* in the TCGA Pan-Cancer samples. **i**, Alteration matrix for *TP53*, *CDKN2A* and methylated *DINO* in TCGA DLBC samples. In the TCGA DLBC dataset, methylated *DINO* and *TP53* alterations trended towards mutual exclusivity, but this did not reach statistical significance due to the small number of DLBC samples with copy number, somatic mutation, and methylation data (n = 37). However, deep deletions of *CDKN2A*, encoding the upstream activator of the p53 tumor suppressor pathway p14ARF, are far more prevalent than *TP53* alterations in DLBC. Methylated *DINO* is mutually exclusive with *CDKN2A* deep deletions individually (P = 0.015) and *CDKN2A* and *TP53* alterations (P = 0.004). **j**, Alteration matrix for methylated *DINO* and *TP53* in a combined dataset of three hematologic malignancies including TCGA DLBC, TCGA LAML, and a chronic lymphocytic leukemia samples (Yosifov et al., 2020) demonstrates that methylated *DINO* and *TP53* are mutually exclusive in hematologic malignancies.



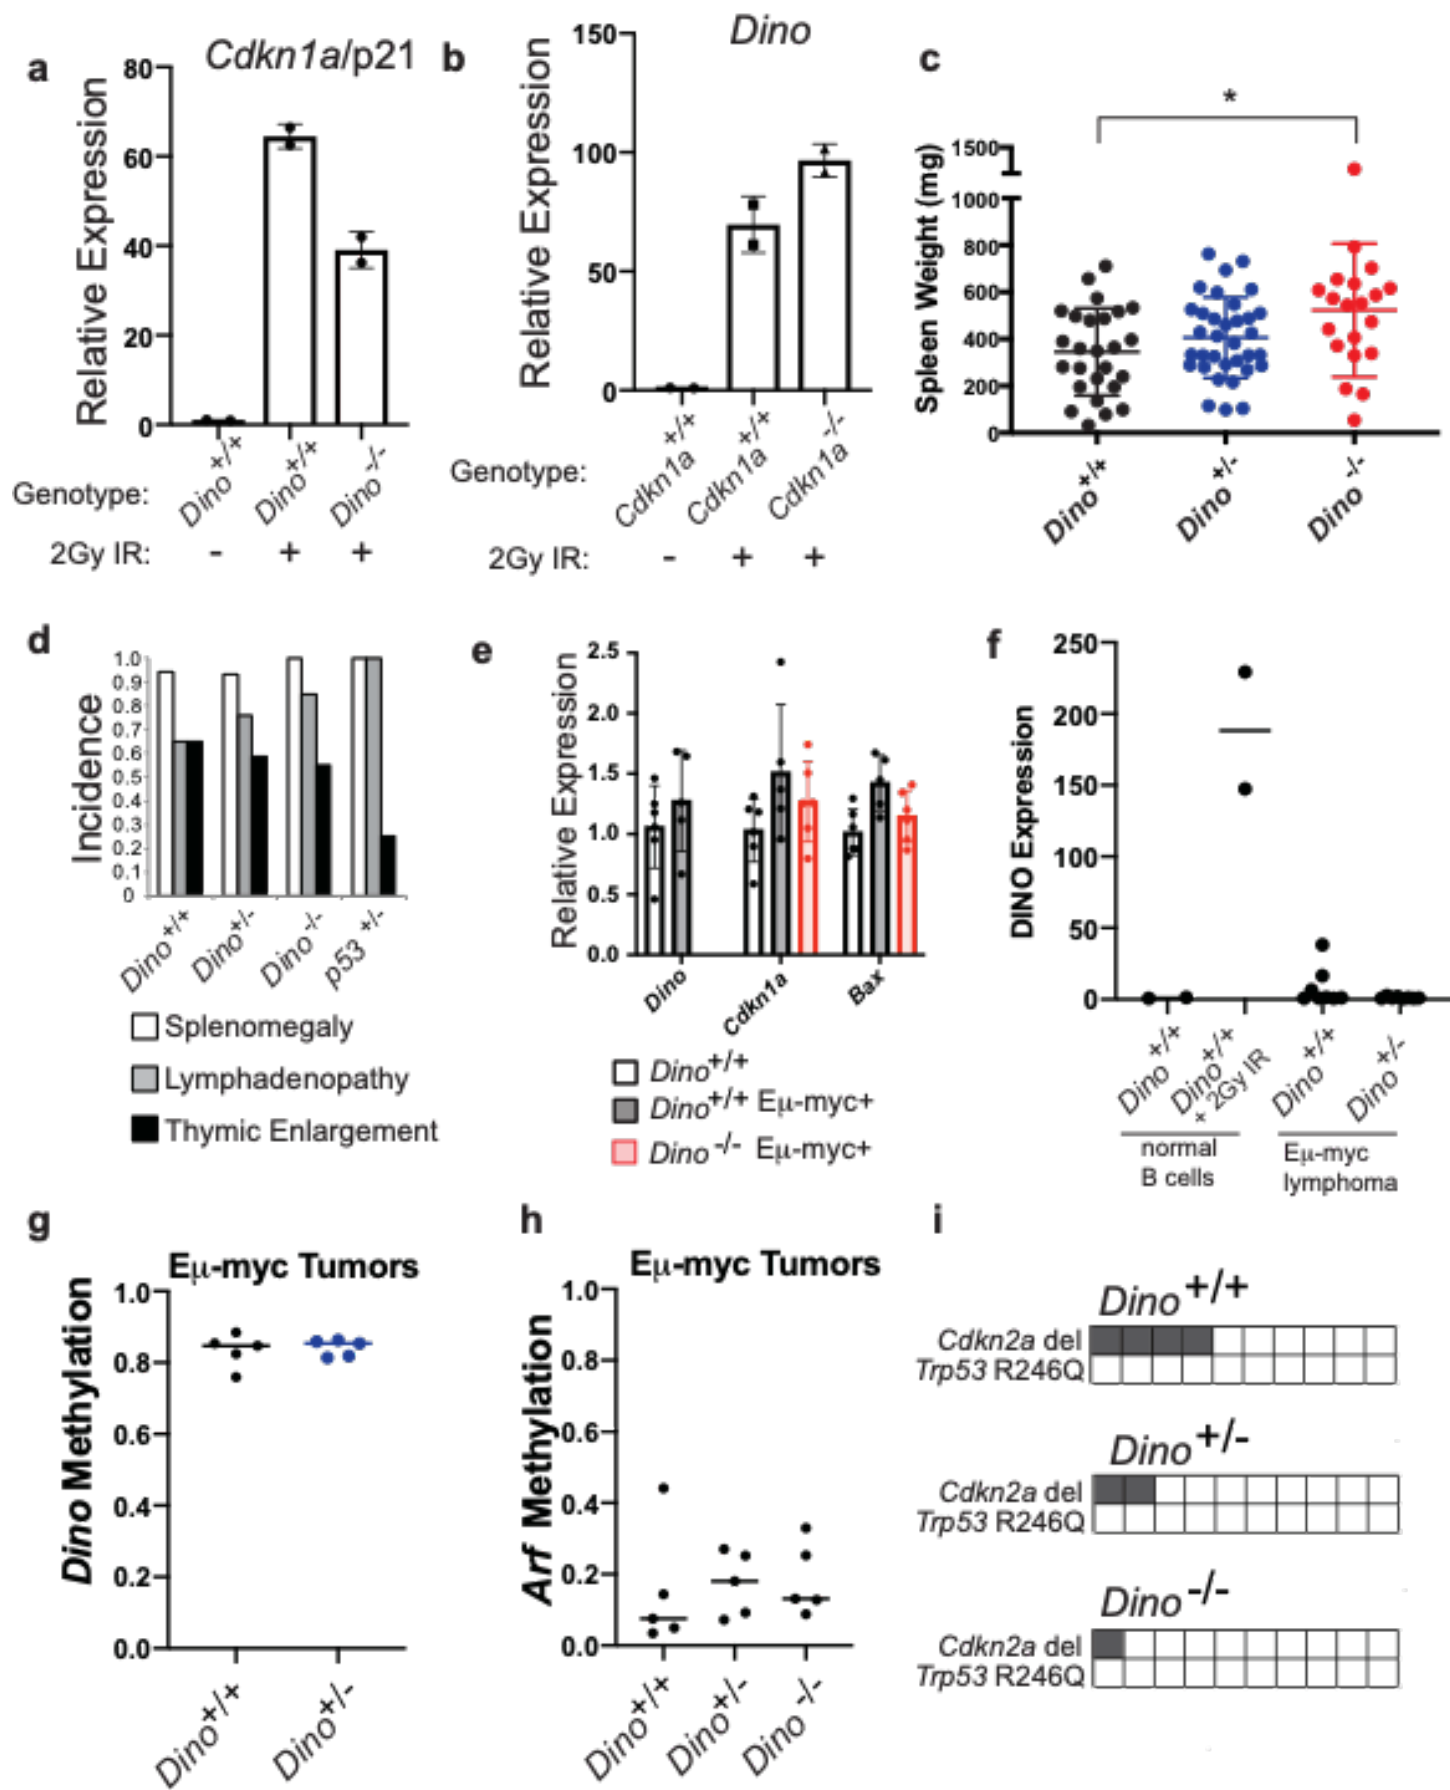

**Figure S2. Dino is required for tumor suppression of mouse E $\mu$ -myc B cell lymphoma. Related to Figure 1.** **a**, Expression of *Cdkn1a* in B cells of indicated *Dino* genotype 6 hours after 2Gy irradiation, mean +/- standard deviation. **b**, Expression of *Dino* in B cells of indicated *Cdkn1a* genotype 6 hours after 2Gy irradiation, mean +/- standard deviation. **c**, Spleen weight at time of death in E $\mu$ -myc mice of indicated genotypes (mean +/- standard deviation, \*P=0.01, two-tailed T-test). **d**, Incidence of organ involvement by E $\mu$ -myc lymphoma in mice of indicated genotype. **e**, Expression of indicated genes in splenic B cells isolated from postnatal day 32 mice of indicated *Dino* and E $\mu$ -myc genotypes, mean +/- standard deviation. **f**, *Dino* expression in normal B cells following sham irradiation or 2Gy irradiation in comparison to *Dino* expression in E $\mu$ -myc lymphomas from *Dino*<sup>+/+</sup> and *Dino*<sup>+/-</sup> mice. **g-h**, average CpG methylation in lymphoma samples from E $\mu$ -myc<sup>+</sup> mice of indicated *Dino* genotype at the *Dino* locus (**g**) and *Cdkn2a/Arf* locus (**h**). **i**, alteration matrix for *Cdkn2a/Arf* deletion or *Trp53 R246Q* mutations in lymphomas from E $\mu$ -myc<sup>+</sup> mice of indicated *Dino* genotype.

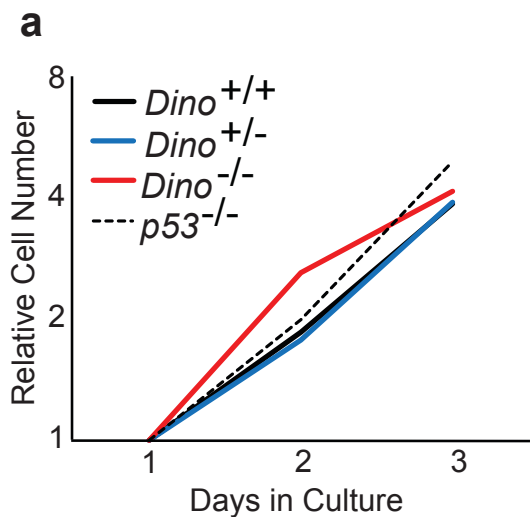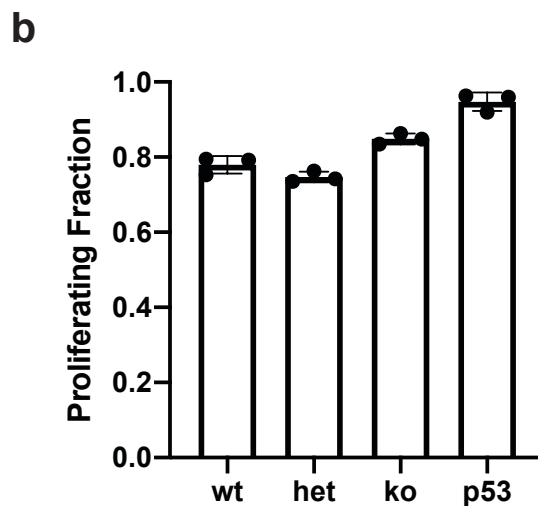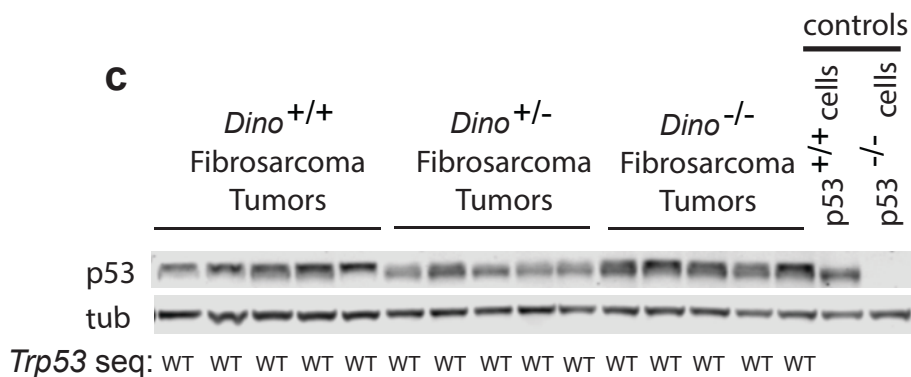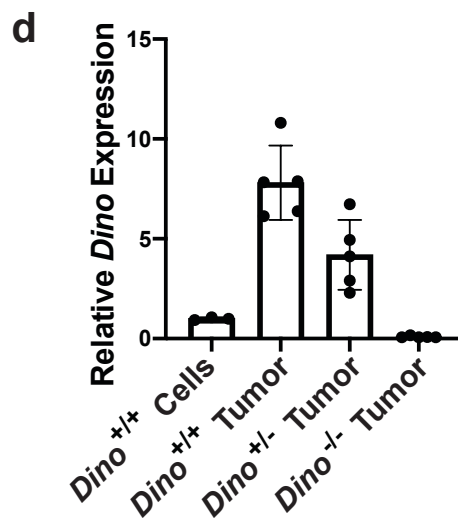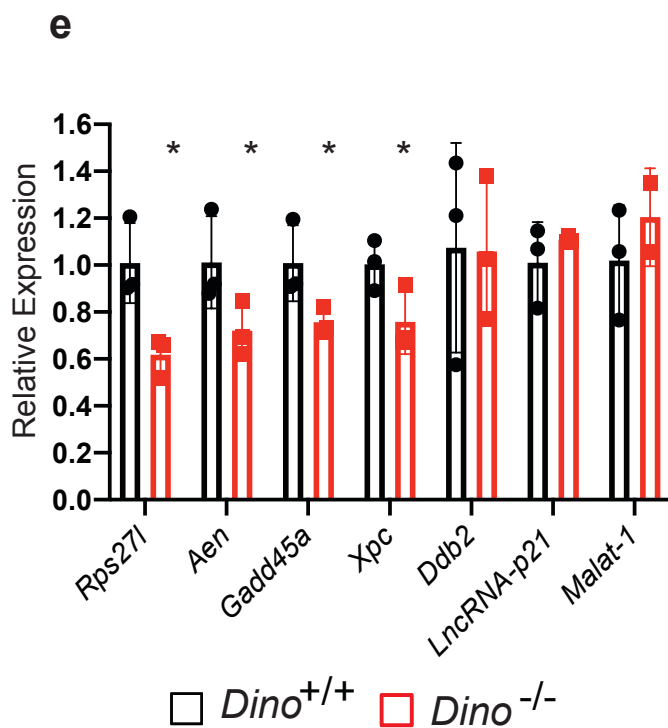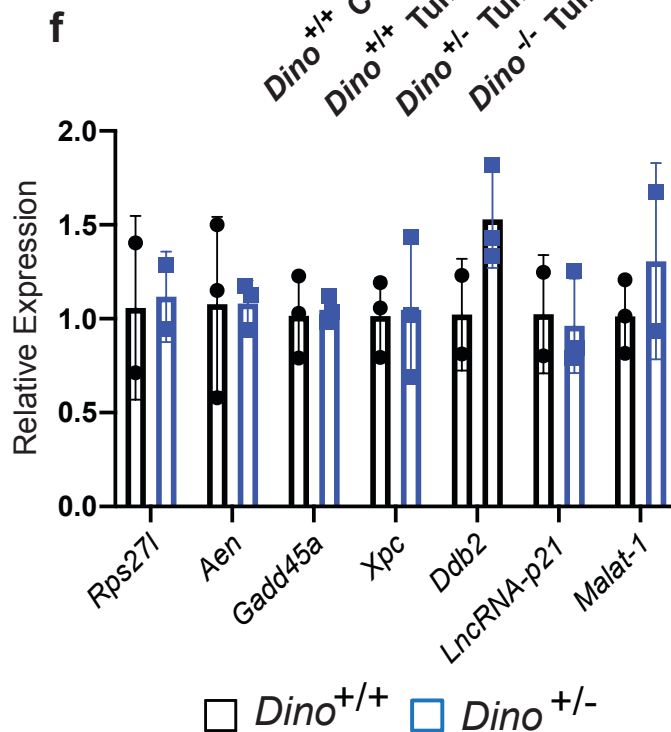

**Figure S3. *Dino* suppresses mouse fibrosarcoma. Related to Figure 2. a**, *in vitro* proliferation assay in E1A, H-ras<sup>G12V</sup> MEFs of indicated genotype. **b**, Percentage of E1A, H-ras<sup>G12V</sup> MEFs of indicated genotype that are EdU+ during tissue culture. **c**, western blot of p53 and  $\beta$ -tubulin in fibrosarcoma tumors of indicated genotype at the endpoint of *in vivo* tumor formation, *in vitro* p53<sup>+/+</sup> and p53<sup>-/-</sup> E1A, H-ras<sup>G12V</sup> MEFs used as a positive and negative control for p53 western. *Trp53* sequencing of these samples revealed all tumors remained *Trp53* wildtype. **d**, *Dino* expression in E1A, H-ras<sup>G12V</sup> MEFs prior to engraftment (cells) and in fibrosarcoma tumors at the endpoint of *in vivo* tumor formation. **e-f**, The expression of p53-induced genes in *Dino*<sup>-/-</sup> E1A-Hras<sup>G12V</sup> cells (**e**) and *Dino*<sup>+/-</sup> E1A-Hras<sup>G12V</sup> cells (f) relative to *Dino*<sup>+/+</sup> E1A-Hras<sup>G12V</sup> controls. (**e**, mean +/- standard deviation, *Rps27l*, P=0.01, *Aen*, P=0.05, *Gadd45a*, P=0.03, *Xpc*, P=0.03, two-tailed T-test), (**f**, mean +/- standard deviation).

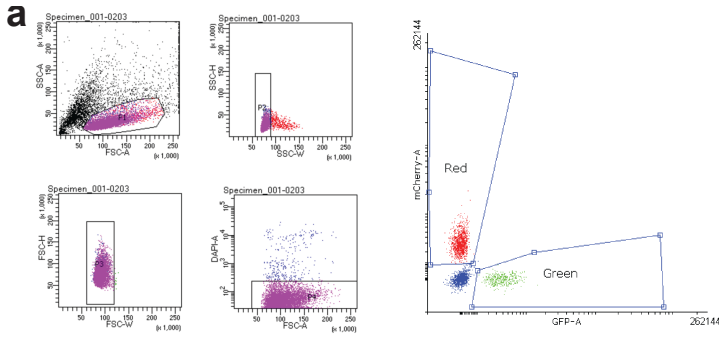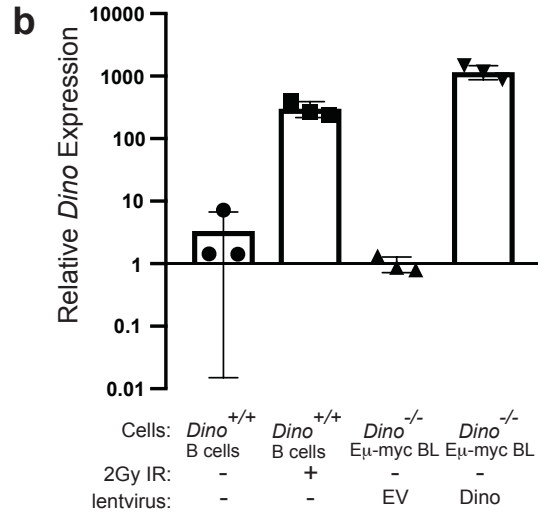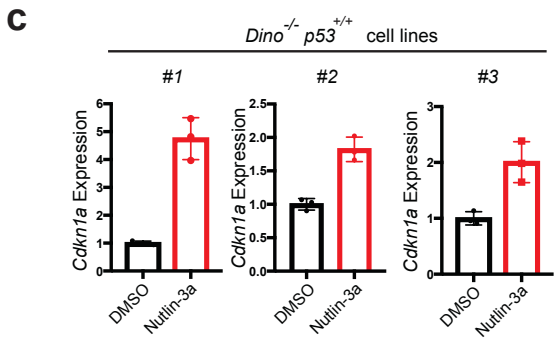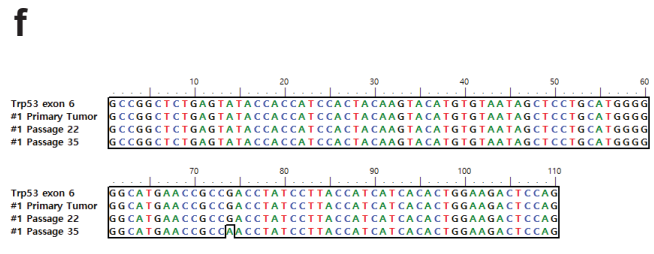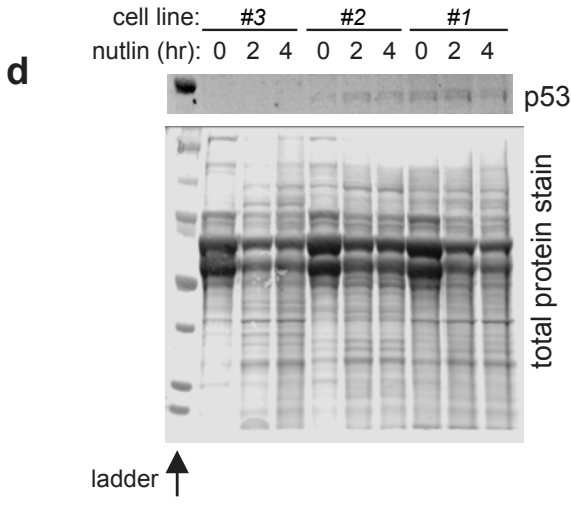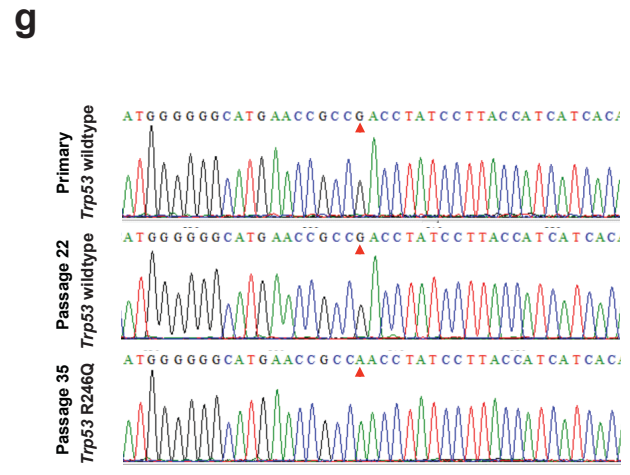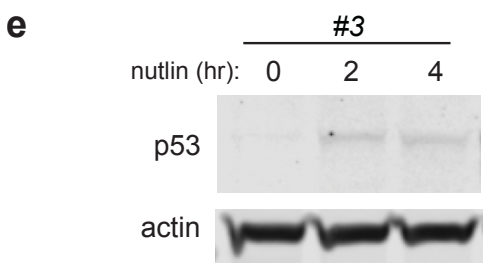

**Figure S4. Development of E $\mu$ -myc lymphoma growth competition assay. Related to Figures 3-4.** **a**, Representative flow cytometry and gates for B lymphoma cells infected with GFP or mCherry expressing lentivirus. **b**, Expression of Dino in *Dino*<sup>+/+</sup> B cells either 6hr after 2Gy radiation or in *Dino*<sup>-/-</sup> B lymphoma cells after infection with EV-GFP or Dino-GFP lentivirus, mean +/- standard deviation. All animals used in this experiment were *p53*<sup>+/+</sup>. **c**, Nutlin-3a induced, p53-dependent *CDKN1A* expression in three *Dino*<sup>-/-</sup> E $\mu$ -myc lymphomas that were adapted to cell culture and retained wild-type *p53* as confirmed by sequencing, (mean +/- standard deviation, #1 P=0.001, #2 P=0.002, #3 P=0.01, two-tailed T-test). **d**, western blot for p53 after 2-4 hours of nutlin treatment in three *Dino*<sup>-/-</sup> E $\mu$ -myc lymphoma cell lines. Total protein was used as a loading control since standard house keeping genes  $\beta$ -tubulin and actin showed significant variability between cell lines. **e**, western blot for cell line 3 after loading a larger amount of protein lysate confirms p53 protein expression after nutlin treatment in this cell line. **f**, *Trp53* exon 6 sequence in *Dino*<sup>-/-</sup> B lymphoma cell line #1 at early and late passages. **g**, Chromatograph for *Trp53* exon 6 sequences of samples in C in region of *p53*<sup>R246Q</sup> mutation.

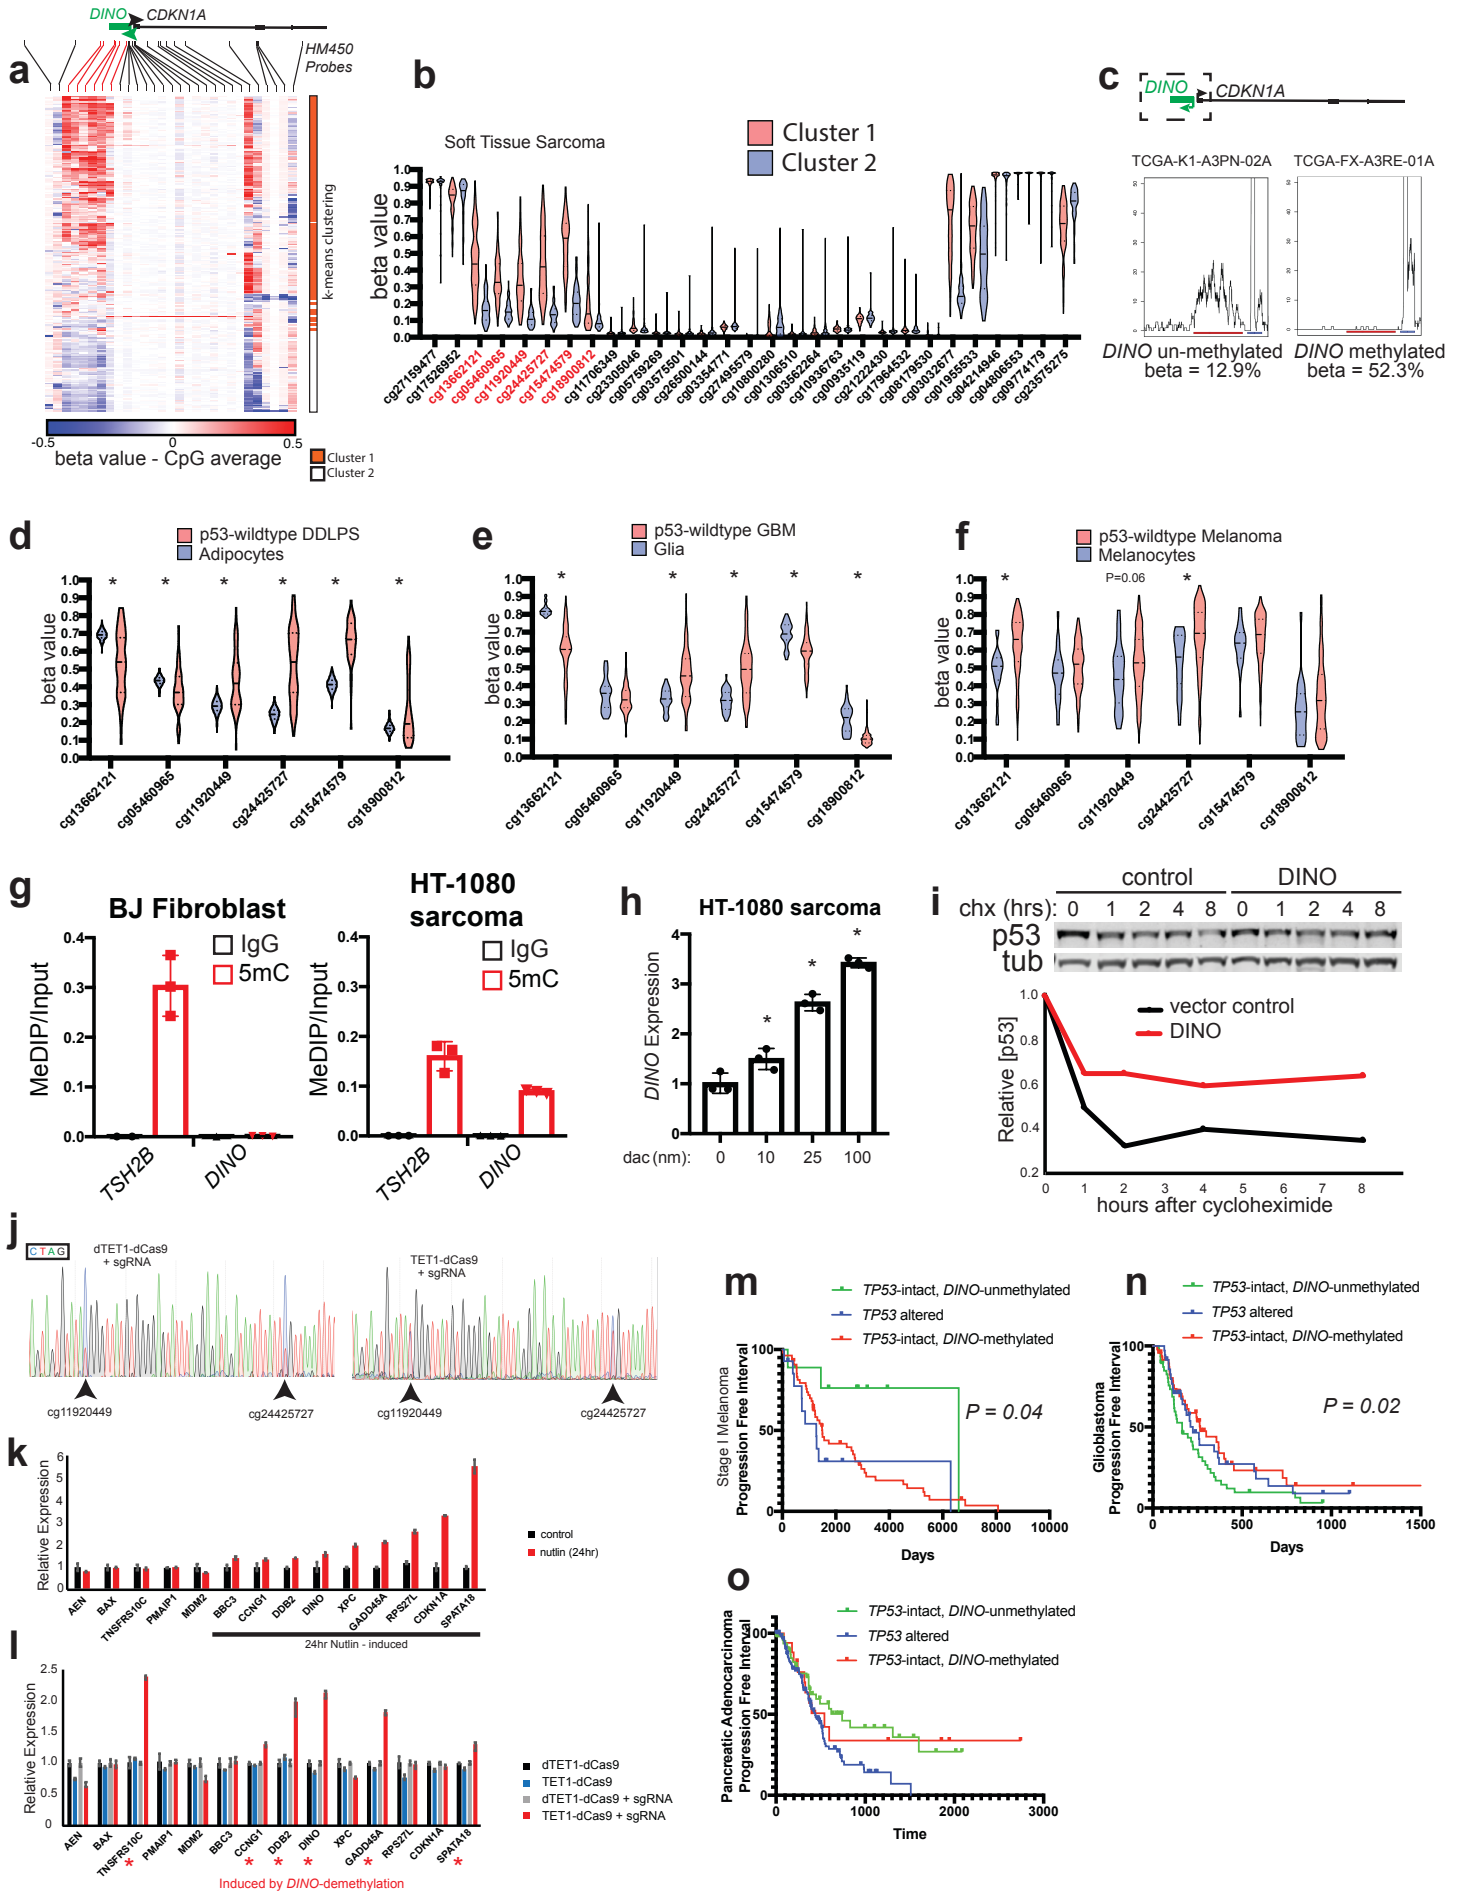

**Figure S5. Regulation of *DINO* by methylation in human cancers. Related to Figure 5. a,** Methylation at HM450 CpGs covering the *DINO/CDKN1A* locus in TCGA SARC samples. Above: red lines indicate position of differentially methylated CpGs downstream of the *DINO* TSS. In this scale, 0 represents average beta value at each CpG across all SARC samples. **b,** Violin plots of methylation beta values at each HM450 CpG at the *DINO/CDKN1A* locus methylated and unmethylated clusters of TCGA SARC. **c,** Genome browser view of RNAseq for *DINO* expression in SARC samples with indicated *DINO* methylation status. Red line indicates the coordinates of *DINO*; blue line indicates exon 1 of *CDKN1A*. **d,** Violin plot of methylation at each *DINO* CpG in p53-intact dedifferentiated liposarcoma samples and normal adipose tissue, mean +/- standard deviation, \*  $P < 10^{-4}$ , two tailed T test. **e,** Violin plot of methylation at each *DINO* CpG in p53-intact glioblastoma samples and normal glia, mean +/- standard deviation, \*  $P < 10^{-4}$ , two tailed T test. **f,** Violin plot of methylation at each *DINO* CpG in p53-intact melanoma samples and normal melanocytes, mean +/- standard deviation, \*  $P < 10^{-3}$ , two tailed T test. **g,** *DINO* and *TSH2B* methylation in BJ fibroblasts and HT-1080 sarcoma cells as measured by MeDIP, mean +/- standard deviation. **h,** *DINO* expression in HT-1080 cells after treatment with indicated dose of 5-aza-2'-deoxycytidine (dac) for 72 hours (mean +/- standard deviation, 10nM dac  $P = 0.046$ , 25nM dac  $P = 0.0004$ , 100nM dac  $P = 5 \times 10^{-5}$ , two-tailed T-test). **i,** quantitative p53 western blot after cycloheximide (chx) chase in HT-1080 cells transfected with pcDNA vector control or pcDNA-DINO. **j,** Sample chromatograms for sequences within the *DINO* DMR after bisulfite conversion of DNA from HT-1080 cells infected with lentivirus expressing sgRNA and TET1-dCas9 or dTET1-dCas9. **k-l,** expression of canonical p53-regulated genes in HT-1080 cells after **(k)** 24 hours of Nutlin-3a treatment or **(l)** in cells infected with indicated CRISPR methylation editing viral constructs (TET1-dCas9 or dTET1-dCas9 with or without a sgRNA targeting the *DINO* DMR). mean +/- standard deviation. **m,** Progression Free Interval in TCGA stage I melanoma patients with tumors of indicated *TP53* and *DINO* methylation status, log-rank test. **n,** Progression Free Interval in glioblastoma patients with tumors of indicated *TP53* and *DINO* methylation status, log-rank test. **o,** Progression Free Interval in pancreatic adenocarcinoma patients with tumors of indicated *TP53* and *DINO* methylation status, log-rank test nonsignificant but patients with *DINO* methylated tumors, like those with *TP53* mutated tumors, had reduced median survival.



|                 | Sample Number | DINOMe $\geq$ 0.5, TP53-wt | DINOMe $\geq$ 0.5, TP53-mut | DINOMe $<$ 0.5, TP53-wt | DINOMe $<$ 0.5, TP53-mut | Fisher Exact P |
|-----------------|---------------|----------------------------|-----------------------------|-------------------------|--------------------------|----------------|
| TCGA Pan-Cancer | 8141          | 2145                       | 751                         | 3123                    | 2122                     | $<0.00001$     |
| TCGA SKCM       | 465           | 318                        | 38                          | 76                      | 33                       | $<0.00001$     |
| TCGA GBM        | 130           | 48                         | 4                           | 48                      | 30                       | 0.0001         |
| TCGA SARC       | 229           | 44                         | 12                          | 88                      | 85                       | 0.0003         |
| TCGA STAD       | 389           | 61                         | 27                          | 142                     | 159                      | 0.0003         |
| TCGA PAAD       | 174           | 19                         | 10                          | 53                      | 92                       | 0.0065         |
| TCGA LUSC       | 351           | 10                         | 16                          | 60                      | 265                      | 0.0209         |

**Table S1. Relationship of *DINO* methylation and *TP53* alterations in select human cancers. Related to Figure 1.**

| Methylation Cutoff | DINOMe $\geq$ cutoff, TP53-wt | DINOMe $\geq$ cutoff, TP53-mut | DINOMe $<$ cutoff, TP53-wt | DINOMe $<$ cutoff, TP53-mut | Fisher Exact P | TP53 Alt (%), DINOMe $\geq$ cutoff | TP53 Alt (%), DINOMe $<$ cutoff |
|--------------------|-------------------------------|--------------------------------|----------------------------|-----------------------------|----------------|------------------------------------|---------------------------------|
| 0.8                | 77                            | 13                             | 5191                       | 2860                        | 0              | 0.144444444                        | 0.355235374                     |
| 0.7                | 424                           | 130                            | 4844                       | 2743                        | $<0.00001$     | 0.23465704                         | 0.361539475                     |
| 0.6                | 1118                          | 370                            | 4150                       | 2503                        | $<0.00001$     | 0.248655914                        | 0.376221254                     |
| 0.5                | 2145                          | 751                            | 3123                       | 2122                        | $<0.00001$     | 0.259323204                        | 0.404575786                     |
| 0.4                | 3283                          | 1355                           | 1985                       | 1518                        | $<0.00001$     | 0.29215179                         | 0.433342849                     |
| 0.3                | 4307                          | 2174                           | 961                        | 699                         | $<0.00001$     | 0.335442061                        | 0.421084337                     |
| 0.2                | 4944                          | 2675                           | 324                        | 198                         | 0.2            | 0.351095944                        | 0.379310345                     |

**Table S2. Mutual exclusivity of *TP53* alterations and *DINO* methylation in the Pan-Cancer dataset across multiple methylation cutoff values. Related to Figure 1.**

|           | Chromosome | Start     | Stop      |
|-----------|------------|-----------|-----------|
| CDKN1A    | chr6       | 36643696  | 36646241  |
| BAX       | chr19      | 49458109  | 49459140  |
| DDB2      | chr11      | 47236249  | 47237682  |
| MDM2      | chr12      | 69202420  | 69203119  |
| RPS27I    | chr15      | 63448812  | 63450014  |
| AEN       | chr15      | 89164217  | 89165584  |
| XPC       | chr3       | 14219749  | 14220446  |
| TNFRSF10C | chr8       | 22925361  | 22926664  |
| BBC3      | chr19      | 47734508  | 47735453  |
| CCNG1     | chr5       | 162864504 | 162865267 |
| GADD45A   | chr1       | 68152194  | 68152661  |
| SPATA18   | chr4       | 52917597  | 52918603  |

**Table S3. Genomic coordinates (Hg19) for p53 ChIP peaks at canonical p53 responsive genes, related to Fig S2A-S2B, from (Younger et al., 2015). Related to Figure 1.**

| Primer                  | Species | Sequence                                         | Purpose                                              |
|-------------------------|---------|--------------------------------------------------|------------------------------------------------------|
| Dino F                  | mouse   | tggagacctgatgataccca                             | Genotyping Dino GFP                                  |
| Dino R                  | mouse   | aagctgggactactcagtc                              | Genotyping Dino GFP                                  |
| Dino-eGFP R             | mouse   | gaactgtggccgtttactgt                             | Genotyping Dino GFP                                  |
| IgH-Fwd                 | mouse   | CCTTTCTGTACGGTTGTTCCGGG                          | Genotyping E-mu Myc                                  |
| Myc Rev                 | mouse   | CCTTTCTGTACGGTTGTTCCGGG                          | Genotyping E-mu Myc                                  |
| mDino Genomic Locus Fwd | mouse   | ggagacctgatgatacccaact                           | Dino Copy Number Genomic QPCR                        |
| mDino Genomic Locus Rev | mouse   | gcacacacacagatgcac                               | Dino Copy Number Genomic QPCR                        |
| Dino-eGFP Fwd           | mouse   | AAGCTGACCTGAAGTTCATCTGC                          | Dino Copy Number Genomic QPCR                        |
| Dino-eGFP Rev           | mouse   | CTTGATGTTGCCGTCGCTTGAA                           | Dino Copy Number Genomic QPCR                        |
| L32 genomic locus Fwd   | mouse   | TTCCTGGTCCCAATGTCAAG                             | Dino Copy Number Genomic QPCR - control              |
| L32 genomic locus Rev   | mouse   | gtctcaggcttaaccaagg                              | Dino Copy Number Genomic QPCR - control              |
| DINO-F                  | human   | GGAGGCCAAAAGTCTGTGTT                             | DINO Genomic qPCR meDIP                              |
| DINO-R                  | human   | GGGCTCAGAGAAGTCTGGTG                             | DINO Genomic qPCR meDIP                              |
| TSH2B-F                 | human   | CAGACATCTCCTCGCATCA                              | TSH2B Genomic qPCR meDIP                             |
| TSH2B-R                 | human   | GGAGGATGAAAGATGCGGTA                             | TSH2B Genomic qPCR meDIP                             |
| mDino-BamHI Fwd         | mouse   | tatataGGATCCgtagaaTTCAGTGCAGGGTGGTGAGA           | mDino cloning into lentiviral vector                 |
| mDino-NotI Rev          | mouse   | tatataGCGGCCGgtaAGTTTGAACGGATATCTTTAGTAAAAAGATCA | mDino cloning into lentiviral vector                 |
| pCDHvirusEF1a-Forward   | plasmid | TCAAGCCTCAGACAGTGGTTC                            | pCDH-EF1 $\alpha$ -MCS-(PGK-GFP-T2A-Puro) sequencing |
| DINO_DMR-1F             | human   | AGAGAGTTTYGGGTAGGAGGTAAAAGTTTTGTG                | bisulfite sequencing                                 |
| DINO_DMR-1R             | human   | CTCCCTACACCCTACACTCACATAAAC                      | bisulfite sequencing                                 |
| DINO_DMR-2F             | human   | TGGAGATTAGGTTGTTTTTTTTGGTAG                      | bisulfite sequencing                                 |
| DINO_DMR-2R             | human   | AAACAAAATTACCAATACAATAAAAAATC                    | bisulfite sequencing                                 |
| TSH2B_DMR_F             | human   | TGTTATTTGATTGGTTGATGGT                           | bisulfite sequencing                                 |
| TSH2B_DMR_R             | human   | CTTTCTAAAACCTTCTTA                               | bisulfite sequencing                                 |
| Dino_me1_F              | mouse   | AATGTTATTTTTATTGTAGAAAGTTTGGA                    | bisulfite sequencing                                 |
| Dino_me1_R              | mouse   | ATCCTATTCAAAAACAATAAAAAAC                        | bisulfite sequencing                                 |
| Dino_me2_F              | mouse   | GTTTTTAATTGTGTTTTTGAATAGGAT                      | bisulfite sequencing                                 |
| Dino_me2_R              | mouse   | AAACTATAAATCTAATCTACTCTCC                        | bisulfite sequencing                                 |
| Cdkn2a_me_F             | mouse   | GGGTTTTTTTTATTGTTTAGGATT                         | bisulfite sequencing                                 |
| Cdkn2a_me_R             | mouse   | CRCAATCTTAACTACTATAAAAAATTC                      | bisulfite sequencing                                 |
| mDino QPCR Fwd          | mouse   | gcaatgggtgctgactat                               | RT-qPCR                                              |
| mDino QPCR Rev          | mouse   | actctgggtccagagc                                 | RT-qPCR                                              |
| hDINO QPCR Fwd          | human   | gggctcagagaagtctggtg                             | RT-qPCR                                              |
| hDINO QPCR Rev          | human   | ggaggcaaaagtctgtgtt                              | RT-qPCR                                              |
| mBax QPCR Fwd           | mouse   | TGAAGACAGGGCCCTTTTG                              | RT-qPCR                                              |
| mBax QPCR Rev           | mouse   | AATTCGCGGAGACTCG                                 | RT-qPCR                                              |
| hBAX_fwd                | human   | TCTGACGGCAACTTCAACTG                             | RT-qPCR                                              |
| hBAX_rev                | human   | CAGCCCATGATGGTTCTGAT                             | RT-qPCR                                              |
| mCdkn1a Fwd             | mouse   | cacagctcagtgactggaa                              | RT-qPCR                                              |
| mCdkn1a Rev             | mouse   | accctagaccacaatgcag                              | RT-qPCR                                              |
| hCDKN1A Fwd             | human   | gaggccggatgagttggaggag                           | RT-qPCR                                              |
| hCDKN1A rev             | human   | cagccggcgttggagtggtgagaa                         | RT-qPCR                                              |
| mB-actin Fwd            | mouse   | tctagcaccatgaagatcaagatc                         | RT-qPCR                                              |
| mB-actin Rev            | mouse   | ctgctgctgatccacatctg                             | RT-qPCR                                              |
| hB-ACTIN Fwd            | human   | catgtacgtgctatcaggc                              | RT-qPCR                                              |
| hB-ACTIN Rev            | human   | ctcctaatgtcacgcagat                              | RT-qPCR                                              |
| hGAPDH Fwd              | human   | gagtcaacggattggtctg                              | RT-qPCR                                              |
| hGAPDH Rev              | human   | ttgatttggaggatctcg                               | RT-qPCR                                              |
| mAen Fwd                | mouse   | CACAAGGCTATCCCCTTTCA                             | RT-qPCR                                              |
| mAen Rev                | mouse   | GAGGGTGGACGTACTTCAGG                             | RT-qPCR                                              |
| hAEN_Fwd                | human   | CATCACTCGGCAGCACAT                               | RT-qPCR                                              |
| hAEN_Rev                | human   | ACTTGAGCGCCTGGAAGTC                              | RT-qPCR                                              |
| mRps27l_Fwd             | mouse   | CTATCCGGGAAGTTGCTGAG                             | RT-qPCR                                              |
| mRps27l_Rev             | mouse   | TCCAAGGAAGGGTGAACAGA                             | RT-qPCR                                              |
| hRPS27L_Fwd             | human   | ATCCGTCCTTGGAAGAGGAA                             | RT-qPCR                                              |
| hRPS27L_Rev             | human   | GCTGAAAACCGTGGTGATCT                             | RT-qPCR                                              |
| mXpc Fwd                | mouse   | CCGAGGACAACAAGTAGCC                              | RT-qPCR                                              |
| mXpc_Rev                | mouse   | CCCTCTTCTCTTTCTTG                                | RT-qPCR                                              |
| hXPC_Fwd                | human   | AAAGAAAGTGGCCAAGGTGA                             | RT-qPCR                                              |
| hXPC_Rev                | human   | CAGATGGTGTGCCTCTTTGA                             | RT-qPCR                                              |
| mDdb2_Fwd               | mouse   | AAATGCCAGAAACCCAGAAG                             | RT-qPCR                                              |
| mDdb2_Rev               | mouse   | GTCCTGCTAGAAACGGGACC                             | RT-qPCR                                              |

|                 |       |                                    |                 |
|-----------------|-------|------------------------------------|-----------------|
| hDDB2_Fwd       | human | TATTACGCCCCAGGAACAAG               | RT-qPCR         |
| hDDB2_Rev       | human | TATTCAGCAGCAGGCACAG                | RT-qPCR         |
| mGadd45a_fwd    | mouse | CCGAAAGGATGGACACGGTG               | RT-qPCR         |
| mGadd45a_Rev    | mouse | TTATCGGGGTCTACGTTGAGC              | RT-qPCR         |
| hGADD45a_Fwd    | human | ATGGATCAATGGGTTCCAGT               | RT-qPCR         |
| hGADD45a_Rev    | human | CCTTGATCAGTGTAGGGAGT               | RT-qPCR         |
| mBbc3_Fwd       | mouse | GCG GCG GAG ACA AGA AGA            | RT-qPCR         |
| mBbc3_Rev       | mouse | AGT CCC ATG AAG AGA TTG TAC ATG AC | RT-qPCR         |
| hBBC3_fwd       | human | GATGGACTCAGCATCGGAAG               | RT-qPCR         |
| hBBC3_rev       | human | CACCAGCACAAACAGCCTTT               | RT-qPCR         |
| mCng1_Fwd       | mouse | CGTGTC TCAGTTCTTTGGC TTTGACACG     | RT-qPCR         |
| mCng1_Rev       | mouse | GATGCTTCGCTGTACCTTCATT             | RT-qPCR         |
| hCCNG1_Fwd      | human | CCTTCTGTGTTGGCATTGTCTATC           | RT-qPCR         |
| hCCNG1_Rev      | human | CAAGCTCTTGCCAGAAGGTCAG             | RT-qPCR         |
| mPerp_Fwd       | mouse | GACCCAGATGCTTGTTTTC                | RT-qPCR         |
| mPerp_Rev       | mouse | CAGCAGGGTTATCGTGAAGC               | RT-qPCR         |
| mMdm2_Fwd       | mouse | GGACTCGGAAGATTACAGCCTGA            | RT-qPCR         |
| mMdm2_Rev       | mouse | TGTCTGATAGACTGTGACCCG              | RT-qPCR         |
| hMDM2_fwd       | human | GAAGGAAACTGGGGAGTCTTG              | RT-qPCR         |
| hMDM2_rev       | human | GGTGGTTACAGCACCATCAG               | RT-qPCR         |
| mPmaip1_Fwd     | mouse | GAGAGCTACCACCTGAGTTC               | RT-qPCR         |
| mPmaip1_Rev     | mouse | CTTTTGCAGCTCCAGGCA                 | RT-qPCR         |
| hPMAIP1_fwd     | human | AGCTGGAAGTCGAGTGTGCT               | RT-qPCR         |
| hPMAIP1_rev     | human | TTTTTGATGCAGTCAGGTTCC              | RT-qPCR         |
| hTNFRSF10C_F    | human | GGTGTGGATTACACCAACGCTTC            | RT-qPCR         |
| hTNFRSF10C_R    | human | CTGACACACTGTGTCTCTGGTC             | RT-qPCR         |
| mMalat1_Fwd     | mouse | ggcggaattgctgtagttt                | RT-qPCR         |
| mMalat1_Rev     | mouse | agcatagcagctacagcctt               | RT-qPCR         |
| mIncp21_Fed     | mouse | GGAGTCTCATGCTCAGAGAAGAA            | RT-qPCR         |
| mIncp21_Rev     | mouse | CCCTGACAGACAAGTACCCTCT             | RT-qPCR         |
| mmTrp53exon1F   | mouse | TGGATGTCCACCTCTTTT                 | gDNA sequencing |
| mmTrp53exon1R   | mouse | GATACAGGTATGGCGGGATG               | gDNA sequencing |
| mmTrp53exon2-3F | mouse | GGACTGCAGGGTCTCAGAAG               | gDNA sequencing |
| mmTrp53exon2-3R | mouse | CTGAAGAGGAACCCCAAAT                | gDNA sequencing |
| mmTrp53ex4-5F   | mouse | TGGTGCTTGACAATGTGTT                | gDNA sequencing |
| mmTrp53ex4-5R   | mouse | TAGCACTCAGGAGGGTGAGG               | gDNA sequencing |
| mmTrp53ex6F     | mouse | CCCTACTTACAACAAAACGAACT            | gDNA sequencing |
| mmTrp53ex6R     | mouse | GGGACTCGTGGAACAGAAAC               | gDNA sequencing |
| mmTrp53ex7-8F   | mouse | GGGGGCTAGTTTACACACA                | gDNA sequencing |
| mmTrp53ex7-8R   | mouse | ATGCGAGAGACAGAGGCAAT               | gDNA sequencing |
| mmTrp53ex9F     | mouse | CAAAACAAAACCTGTAAGTGGA             | gDNA sequencing |
| mmTrp53ex9R     | mouse | GGTGAGCCCTAAGCATCTA                | gDNA sequencing |
| mmTrp53ex10F    | mouse | GATGATGGTGGTGGTGATGA               | gDNA sequencing |
| mmTrp53ex10R    | mouse | CTACTCAGAGAGGGGGCTGA               | gDNA sequencing |

| Name                                      | Source             | ID       | Reference                    |
|-------------------------------------------|--------------------|----------|------------------------------|
| pCDH-EF1 $\alpha$ -MCS-(PGK-GFP-T2A-Puro) | System Biosciences | CD813A-1 |                              |
| pBabe 12S E1A                             | Addgene            | 18742    | (Samuelson and Lowe, 1997)   |
| pWZL hygro H-Ras V12                      | Addgene            | 18749    | (Serrano et al., 1997)       |
| pBABE-zeo                                 | Addgene            | 1766     | (Morgenstern and Land, 1990) |
| Fuw-dCas9-Tet1CD-P2A-BFP,                 | Addgene            | 108245   | (Liu et al., 2018)           |
| Fuw-dCas9-dead Tet1CD-P2A-BFP             | Addgene            | 108246   | (Liu et al., 2018)           |

|                |         |       |                       |
|----------------|---------|-------|-----------------------|
| pgRNA-modified | Addgene | 84477 | (Liu et al.,<br>2016) |
|----------------|---------|-------|-----------------------|

**Table S4. Primers and plasmids used in the study. Related to Figures 1, 2, 4, and 5.**
